# Supplementary material for: Multiple impacts of microplastics can threaten marine habitat-forming species
Source: PubMed Central journal article supplement (PMC8010021; doi:10.1038/s42003-021-01961-1), 2021-03-30
Supplement: 42003_2021_1961_MOESM1_ESM.pdf [file 42003_2021_1961_MOESM1_ESM.pdf]

1 **Supplementary Information**

2

3 **Multiple impacts of microplastics can threaten marine habitat-forming species**

4 Cinzia Corinaldesi<sup>1\*</sup>, Sara Canensi<sup>2</sup>, Antonio Dell'Anno<sup>2</sup>, Michael Tangherlini<sup>3</sup>, Iole Di Capua<sup>4</sup>,  
5 Stefano Varrella<sup>1</sup>, Trevor J. Willis<sup>5</sup>, Carlo Cerrano<sup>2</sup>, Roberto Danovaro<sup>2,4</sup>

6

7 *<sup>1</sup>Department of Materials, Environmental Sciences and Urban Planning, Polytechnic University of*  
8 *Marche, Via Brecce Bianche, 60131 Ancona, Italy*

9 *<sup>2</sup>Department of Life and Environmental Sciences, Polytechnic University of Marche, Via Brecce*  
10 *Bianche, 60131 Ancona, Italy*

11 *<sup>3</sup>Department of Research Infrastructures for Marine Biological Resources, Stazione Zoologica*  
12 *Anton Dohrn, Fano Marine Centre, Viale Adriatico 1-N, 61032 Fano, Italy*

13 *<sup>4</sup>Stazione Zoologica Anton Dohrn, Villa Comunale, 80121 Naples, Italy*

14 *<sup>5</sup>Department of Integrative Marine Ecology, Stazione Zoologica Anton Dohrn, Fano Marine*  
15 *Centre, Viale Adriatico 1-N, 61032 Fano, Italy*

16

17

18 *\*Prof. Cinzia Corinaldesi*

19 *e-mail: c.corinaldesi@univpm.it*

20

21

22

23

24

25

26 Supplementary Methods  
27 Supplementary Results  
28 Supplementary Figures 1-4  
29 Supplementary Tables 1-5  
30 Supplementary References

31

32

33

34

35

36

37

38

39

40

41

42

43

44

45

46

47

48

## 49 **Supplementary Methods**

### 50 **Microplastic mixture, size class distribution and quality check**

51 Plastic particles were sieved onto 1000  $\mu\text{m}$  and 20  $\mu\text{m}$  meshes to obtain homogeneous size classes  
52 among different polymers, and these were rinsed 3 times with 0.02  $\mu\text{m}$  pre-filtered milliQ sterilized  
53 seawater to exclude as much as possible the presence of nanoparticles. We weighted 1 g of each  
54 polymer (stock amount) by using an analytical balance (AS, RADWAG, accuracy  $\pm 0.001$  g), then  
55 we counted under stereomicroscope at 50 $\times$  magnification (Zeiss Stami 2000), the number of  
56 particles contained in each aliquot. The relative quantity of the different plastic polymers added to  
57 the 12 L was estimated on the basis of the weight of the particles contained within the stock amount  
58 for each experimental treatment (100, 500 and 1000 microplastic particles  $\text{L}^{-1}$ ), and considering the  
59 percentage of each polymer reported for the natural environment (Supplementary Table 5). Before  
60 addition to the systems, the different polymers were combined and homogenized to obtain  
61 microplastic mixtures.

62 A further analysis on the microplastic mixtures revealed a very similar abundance of particles for  
63 the three size classes selected (20-200  $\mu\text{m}$ , 200-500  $\mu\text{m}$  and 500-1000  $\mu\text{m}$ ; variation coefficient <10  
64 %).

65 The FT-IR spectroscopy analyses (Perkin Elmer, software Packages Spectrum 5.3.1) performed on  
66 a subsample of the microplastic mixture showed that the chemical characteristics of the polymers  
67 remained identical comparing the samples before and after milling.

68 Before adding microplastics to each tank, we also tested the potential contamination of the  
69 polymers by prokaryotic DNA, by qPCR analyses using the TaqMan technology<sup>1</sup> targeting  
70 prokaryotic 16S rRNA genes. The results of qPCR analyses revealed that the copy number of 16S  
71 rRNA genes associated with the plastic mixture was always below detection limits.

72

73

74

75

76

77 **DNA extraction and quantitative PCR analyses for assessing microplastics' contamination by**  
78 **prokaryotic DNA**

79 DNA extraction from microplastics was performed using QIAGEN DNeasy Blood & Tissue Kit  
80 with some modifications. In brief, microplastic mixture samples ( $\approx 25$  mg) were digested in  
81 proteinase K at 56 °C overnight. Then, samples were subjected to ultrasound treatment (three 1-min  
82 treatments using a Branson Sonifier 2200; 60W), after that, they were processed according to the  
83 manufacturer's protocol under laminar flow hood.

84 The prokaryotic 16S rDNA sequences were amplified using the forward primer, 5'-  
85 TCCTACGGGAGGCAGCAGT-3' and reverse (5'-GGACTACCAGGGTATCTAATCCTGTT-3')<sup>2</sup>.  
86 The TaqMan probe was (5'-CGTATTACCGCGGCTGCTGGCAC-3'), which contained a  
87 fluorescent reporter dye (6-carboxyfluorescein) covalently attached to the 5'-end and a fluorescent  
88 quencher dye (6-carboxytetramethylrhodamine) attached downstream of the reporter dye. The  
89 cycling conditions were: 3 minutes at 95°C, followed by 40 cycles of 15 sec 95°C, 1 minute, 60°C.  
90 All of the qPCR reactions were performed in a volume of 15  $\mu$ L with a CFXConnect<sup>TM</sup> Real-Time  
91 PCR detection system (BioRad, Milan, Italy) using iQ Supermix (2 $\times$ ; Bio-Rad) containing 40 mM  
92 Tris-HCl, pH 8.4, 100 mM KCl, 0.4 mM each dNTP (dATP, dCTP, dGTP, dTTP), 50 U mL<sup>-1</sup> hot-  
93 start iTaq DNA polymerase and 6 mM MgCl<sub>2</sub>. In addition, each reaction mix contained 0.1/0.1  $\mu$ M  
94 primers/probes, and 1  $\mu$ l of template DNA.

95 To test for the absence of 16S rDNA gene copies, linear calibration curves were performed from a  
96 standard solution of *E. coli* (from 0.2 to 200 pg  $\mu$ L<sup>-1</sup>).

97 To test for possible inhibition of qPCR, using undiluted aliquots of extracted DNA, in addition to  
98 running all sample extracts in serial 10-fold dilutions. All samples, standards, and negative controls  
99 were analysed in triplicate qPCR reactions.

100 The iCycler software analysis programme was used to calculate the Ct values and generate standard  
101 curves. The "Ct cut off value" of analysed samples was set at 35 cycles of the PCR above which  
102 any measurement response was considered as amplification or fluorescence artefacts and not due to  
103 contamination. Since no contamination was detected in the samples investigated, the procedure  
104 utilised here allowed us to demonstrate that the microplastic mixture added to the mesocosms was  
105 devoid of any external contamination by prokaryotic DNA.

106

107

108 **Monitoring microplastic concentrations in the seawater during the time-course experiment**

109 Changes in microplastic concentrations were monitored in the CTRL MPs (i.e., control tanks  
110 containing seawater added with 1000 microplastic particles L<sup>-1</sup> without corals) at day 1, 7 and 14 of  
111 the time course experiment. This system allowed us to quantify the potential loss of microplastic  
112 particles from the system (e.g., due to the adsorption onto the tank walls) not attributable to the  
113 ingestion by corals. To monitor particle concentration in the CTRL MPs, 1 litre of seawater was  
114 filtered at each sampling time onto 20 µm pore size filters (Sefar Nitex, Agrinova) and  
115 microplastics were counted under stereomicroscope as reported above. The number of microplastic  
116 particles lost during the experiment was determined by difference between the concentration of  
117 microplastic particles initially added to the treatments (considering 1000 microplastic particles L<sup>-1</sup>)  
118 and the number of microplastic particles counted in the CTRL MPs at each sampling time.

119 The amount of microplastic mixture removed by water sampling for the different analyses carried  
120 out in the experiment was estimated considering the water volumes collected for such analyses and  
121 the abundance of microplastics contained therein (assuming a homogeneous distribution of  
122 microplastic particles in the tanks).

123 The number of microplastic particles, which remained at the end of the experiment in the tanks  
124 containing corals exposed to 1000 microplastics, was determined after filtering all seawater of the  
125 tanks (onto 20 µm pore size filters) and counting microplastic particles under the microscope.

126

127

128 **Supplementary results**

129 **Microplastic concentrations in sea water during the time-course experiment**

130 The monitoring of microplastic concentrations in the CTRL MPS (i.e., control tanks containing the  
131 highest concentrations of microplastics without coral branches; 1000 microplastic particles L<sup>-1</sup>)  
132 revealed a number of microplastic particles ranging from 608 to 633 L<sup>-1</sup>, after 1, 7 and 14 days  
133 respectively (equivalent to an average recovery of 62% of the amount added at the beginning of the  
134 experiment). These data were used to correct the microplastic concentrations, to which corals were  
135 exposed in the experimental systems.

136 At the end of the experiment, we recounted all the particles remaining in the control tanks (CTRL  
137 MPS), and we confirmed that, on average, ca. 38% of the initial microplastic mixture was  
138 potentially adsorbed to wall tanks. The tanks with the coral branches, at the end of the experiment,  
139 contained on average ca. 5% of the total microplastic mixture initially added. We also estimated  
140 that ca. 1% of the microplastic mixture was removed by water sampling used for all the analyses,  
141 and that, based on the results of our study, most of the microplastics added to the systems were  
142 taken by corals and *Artemia nauplii* used to feed them.

143

144 **Supplementary Figures**

a

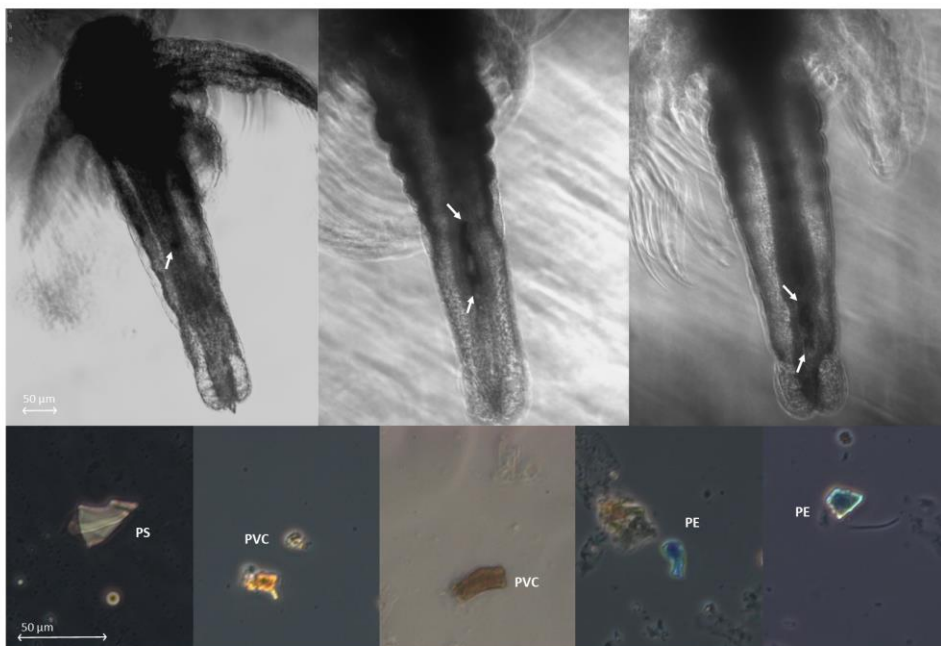

145

b

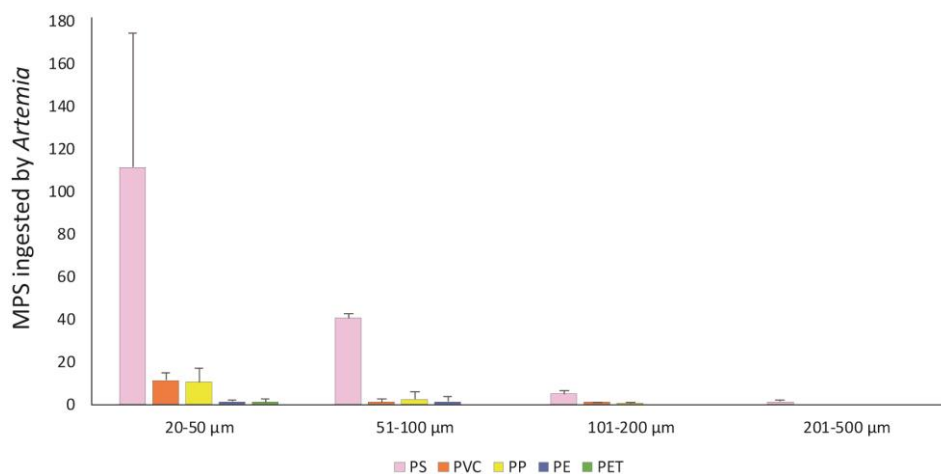

152

153 **Supplementary Figure 1. Microplastic polymers ingested by *Artemia salina*:** (a) images of  
 154 naupliar stages of *Artemia salina* with microplastic fragments (see the white arrows) in digestive  
 155 tract; below images of microplastic polymers, after enzymatic digestion, ingested by nauplii during  
 156 the experiment; (b) number of different microplastic polymers ingested by *A. salina* (100 nauplii)  
 157 according to the different size ranges (20-50 µm, 51-100 µm, 101-200 µm and 201-500 µm) over  
 158 10 days of experiment exposed to 1000 microplastic particles L<sup>-1</sup>. Polymers with size > 200 µm  
 159 were not ingested by *A. salina*. Plastic abbreviations: PS= polystyrene, PVC= polyvinylchloride,

160 PE= polyethylene, PP= polypropylene, PET= polyethylene terephthalate. Data are represented as  
161 mean  $\pm$  standard deviation.

162

163

164

165

166

167

168

169

170

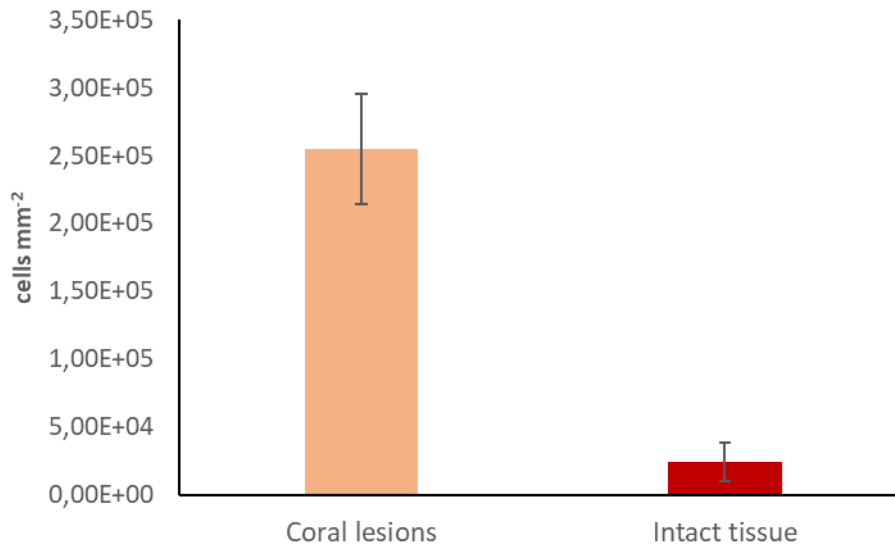

171

172

173 **Supplementary Figure 2.** Prokaryotic abundance, determined by SEM analyses, around lesions of  
174 the corals exposed to high concentration of microplastic particles L<sup>-1</sup> and on the intact tissue. Data  
175 are represented as mean  $\pm$  standard deviation.

176

177

178

179

180

181

182

183



184

185

186

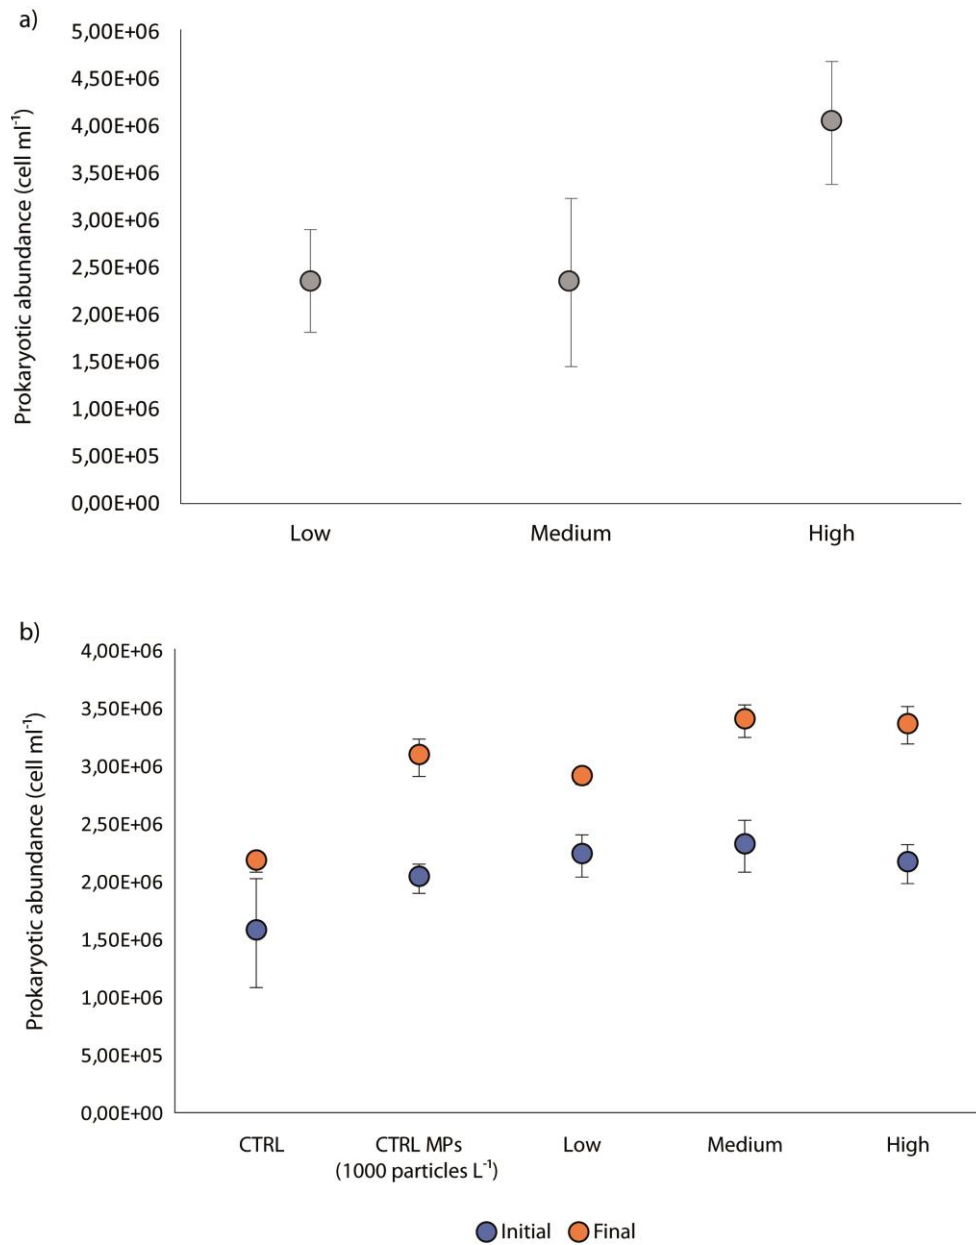

187

188

189 **Supplementary Figure 3. Prokaryotic abundance in coral mucus and seawater.** a) Total  
190 prokaryotic abundances in mucus after 14 days of the experiment at increasing microplastic  
191 concentrations (low, medium and high concentrations of microplastic particles). In the controls,  
192 coral mucus was not produced. b) Total prokaryotic abundance in seawater of the experimental  
193 systems with and without microplastics (CTRL, control). The prokaryotic abundance in systems

194 containing seawater and microplastics (1000 microplastic particles L<sup>-1</sup>) but without corals (Ctrl  
 195 MPs) is also shown. Data are represented as mean ± standard deviation.

196

197 **Supplementary Table 1.** Time-course feeding experiments (at t<sub>0</sub> and after 2 and 4 hours) of *C.*  
 198 *rubrum* using *A. salina* nauplii in the different microplastic treatments (low, medium and high  
 199 concentrations of microplastic particles) and in the controls at 2<sup>nd</sup> and 10<sup>th</sup> days.

| 2 <sup>nd</sup> day of experiment |                   | Ctrl                      | Low concentration         | Medium concentration      | High concentration        |
|-----------------------------------|-------------------|---------------------------|---------------------------|---------------------------|---------------------------|
| Replicate                         | Sampling time (h) | Nauplii per L of seawater | Nauplii per L of seawater | Nauplii per L of seawater | Nauplii per L of seawater |
| r1                                | 0                 | 1033                      | 1125                      | 990                       | 863                       |
| r2                                | 0                 | 1116                      | 1387                      | 1084                      | 896                       |
| r3                                | 0                 | 950                       | 863                       | 896                       | 829                       |
| r1                                | 2                 | 808                       | 567                       | 520                       | 675                       |
| r2                                | 2                 | 929                       | 675                       | 691                       | 761                       |
| r3                                | 2                 | 688                       | 458                       | 349                       | 589                       |
| r1                                | 4                 | 675                       | 292                       | 263                       | 475                       |
| r2                                | 4                 | 820                       | 355                       | 398                       | 554                       |
| r3                                | 4                 | 530                       | 228                       | 127                       | 396                       |

| 10 <sup>th</sup> day of experiment |  | Ctrl | Low concentration | Medium concentration | High concentration |
|------------------------------------|--|------|-------------------|----------------------|--------------------|
|------------------------------------|--|------|-------------------|----------------------|--------------------|

| <b>Replicate</b> | <b>Nauplii per L of seawater</b> | <b>Nauplii per L of seawater</b> | <b>Nauplii per L of seawater</b> | <b>Nauplii per L of seawater</b> | <b>nauplii/L of seawater</b> |
|------------------|----------------------------------|----------------------------------|----------------------------------|----------------------------------|------------------------------|
| r1               | 0                                | 1210                             | 1063                             | 942                              | 1250                         |
| r2               | 0                                | 1286                             | 1228                             | 1039                             | 1330                         |
| r3               | 0                                | 1134                             | 897                              | 844                              | 1170                         |
| r1               | 2                                | 1000                             | 750                              | 858                              | 1200                         |
| r2               | 2                                | 1000                             | 899                              | 955                              | 1250                         |
| r3               | 2                                | 1000                             | 601                              | 761                              | 1150                         |
| r1               | 4                                | 825                              | 525                              | 708                              | 1100                         |
| r2               | 4                                | 850                              | 671                              | 816                              | 1150                         |
| r3               | 4                                | 800                              | 379                              | 601                              | 1050                         |

200

201

202

203 **Supplementary Table 2.** Equation of the linear regression, regression coefficient (R), P value of  
 204 the linear regression model applied to the results of the time-course feeding experiments (see  
 205 Supplementary Table 1).

206

| <b><u>2<sup>nd</sup> day of experiment</u></b> |                                   |          |          |
|------------------------------------------------|-----------------------------------|----------|----------|
| <b>Treatment</b>                               | <b>Linear regression equation</b> | <b>R</b> | <b>P</b> |
| <b>Ctrl</b>                                    | $y = -89.58x + 1018.05$           | 0.82     | 0.0059   |
| <b>Low concentration</b>                       | $y = -208.33x + 1077.77$          | 0.91     | 0.0005   |
| <b>Medium concentration</b>                    | $y = -181.87x + 954.58$           | 0.92     | 0.0003   |
| <b>High concentration</b>                      | $y = -96.87x + 864.58$            | 0.93     | 0.0001   |

207

| <b><u>10<sup>th</sup> day of experiment</u></b> |                                |          |             |
|-------------------------------------------------|--------------------------------|----------|-------------|
| <b>Treatment</b>                                | <b>Linear regression model</b> | <b>R</b> | <b>F</b>    |
| <b>Ctrl</b>                                     | $y = -96.25x + 1204.16$        | 0.97     | 1.35683E-05 |
| <b>Low concentration</b>                        | $y = -134.37x + 1047.91$       | 0.86     | 0.0025      |
| <b>Medium concentration</b>                     | $y = -58.33x + 952.77$         | 0.75     | 0.0198      |
| <b>High concentration</b>                       | $Y = -37.50x + 1258.33$        | 0.76     | 0.0165      |

208

209

210

211 **Supplementary Table 3.** Results of Student's t-test comparing gene expression levels analysed from  
 212 the controls (i.e., samples not exposed to microplastic particles) at the beginning (T<sub>0</sub>) and after 10  
 213 days (T<sub>10</sub>).

214

215

|                                        | <i>cytb</i>    |                | <i>MtMutS</i>  |                | <i>hsp70</i>   |                | <i>hsp60</i>   |                | <i>EF1</i>     |                | <i>MnSOD</i>   |                |
|----------------------------------------|----------------|----------------|----------------|----------------|----------------|----------------|----------------|----------------|----------------|----------------|----------------|----------------|
|                                        | <i>p-value</i> | <i>t-value</i> | <i>p-value</i> | <i>t-value</i> | <i>p-value</i> | <i>t-value</i> | <i>p-value</i> | <i>t-value</i> | <i>p-value</i> | <i>t-value</i> | <i>p-value</i> | <i>t-value</i> |
| <b>T<sub>0</sub> vs T<sub>10</sub></b> | 0.1864         | 1.5930         | 0.1555         | 1.7470         | 0.1397         | 1.8390         | 0.0728         | 2.420          | 0.0212         | 3.6810         | 0.9529         | 0.0628         |

216

217 **Supplementary Table 4.** Results of one-way ANOVA showing the effects of treatment (low,  
 218 medium and high concentrations of microplastic particles) on the expression levels of *cytb*, *MtMutS*,  
 219 *hsp70*, *hsp60*, *EF1*, *MnSOD* genes compared to control, and multiple comparisons test between  
 220 control and different levels of treatment.

221

| Source        | df | SS       | F     | P        | Bonferroni-adjusted multiple comparisons |                |                         |                |                       |                |
|---------------|----|----------|-------|----------|------------------------------------------|----------------|-------------------------|----------------|-----------------------|----------------|
|               |    |          |       |          | control vs low conc.                     |                | control vs medium conc. |                | control vs high conc. |                |
|               |    |          |       |          | <i>p-value</i>                           | <i>t-value</i> | <i>p-value</i>          | <i>t-value</i> | <i>p-value</i>        | <i>t-value</i> |
| <i>cytb</i>   |    |          |       |          |                                          |                |                         |                |                       |                |
| Treatment     | 3  | 0.3161   | 12.78 | P=0.0020 | >0.9999                                  | 0.9199         | 0.0292                  | 3.374          | 0.0015                | 5.609          |
| Residual      | 8  | 0.06594  |       |          |                                          |                |                         |                |                       |                |
| <i>MtMutS</i> |    |          |       |          |                                          |                |                         |                |                       |                |
| Treatment     | 3  | 0.0733   | 6.012 | P=0.0190 | >0.9999                                  | 0.4993         | 0.0307                  | 3.340          | 0.0430                | 3.114          |
| Residual      | 8  | 0.0325   |       |          |                                          |                |                         |                |                       |                |
| <i>hsp70</i>  |    |          |       |          |                                          |                |                         |                |                       |                |
| Treatment     | 3  | 1.57E-04 | 10.52 | P=0.0038 | >0.9999                                  | 0.938          | 0.0163                  | 3.658          | 0.0026                | 5.156          |
| Residual      | 8  | 3.99E-05 |       |          |                                          |                |                         |                |                       |                |
| <i>hsp60</i>  |    |          |       |          |                                          |                |                         |                |                       |                |
| Treatment     | 3  | 2.39E-05 | 15.62 | P=0.0010 | >0.2179                                  | 1.923          | >0.9999                 | 0.0235         | 0.0050                | 4.642          |
| Residual      | 8  | 4.84E-06 |       |          |                                          |                |                         |                |                       |                |
| <i>EF1</i>    |    |          |       |          |                                          |                |                         |                |                       |                |
| Treatment     | 3  | 5.70E-08 | 378.1 | P<0.0001 | >0.9999                                  | 0.6218         | <0.0001                 | 28.04          | >0.9769               | 1.047          |
| Residual      | 8  | 4.02E-10 |       |          |                                          |                |                         |                |                       |                |
| <i>MnSOD</i>  |    |          |       |          |                                          |                |                         |                |                       |                |
| Treatment     | 3  | 3.55E-07 | 14.03 | P<0.0001 | >0.9999                                  | 0.3015         | >0.9999                 | 0.4338         | 0.0017                | 5.530          |
| Residual      | 8  | 5.91E-08 |       |          |                                          |                |                         |                |                       |                |

222 **Supplementary Table 5.** Plastic polymers added to the systems, density and contribution (%) of  
223 each polymer in the mixture.

224

| Polymers                            | Density<br>(g cm <sup>-3</sup> ) | %    |
|-------------------------------------|----------------------------------|------|
| 1. Polyethylene (PE)                | 0.91-0.97                        | 76.6 |
| 2. Polypropylene (PP)               | 0.89-0.92                        | 10.9 |
| 3. Polystyrene (PS)                 | 1.04-1.1                         | 7.3  |
| 4. Polyvinyl chloride (PVC)         | 1.16-1.58                        | 3.3  |
| 5. Polyethylene terephthalate (PET) | 1.37-1.45                        | 1.8  |

225

226

227

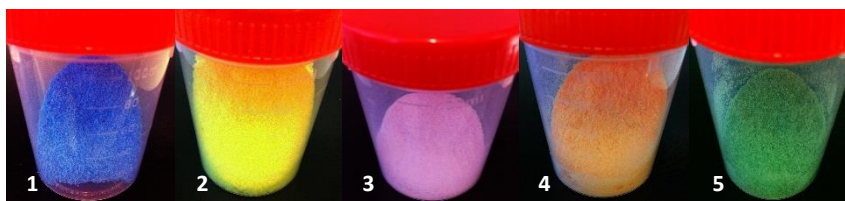

228

229

230

231

232

233

234

235

236

237 **Supplementary Table 6.** Gene names, acronyms, functions and primer sequences (5'=>3') are  
 238 reported for the reference gene and the genes analysed. \*primer sequences retrieved from  
 239 Haguenuer et al. <sup>3</sup>

| Gene and acronym                                  | Primer                       | Sequence (5'=>3')                                 | Function                                                   | References |
|---------------------------------------------------|------------------------------|---------------------------------------------------|------------------------------------------------------------|------------|
| <b>Cytochrome oxidase I</b><br>(COI)*             | Cr_COI_For<br>Cr_COI_Rev     | GTTCCCACCGGGATTAAGAT<br>CTCCGGTTAAACCACCAATG      |                                                            |            |
| <b>Heat shock protein 70</b><br>(hsp70)*          | Cr_HSP70_For<br>Cr_HSP70_Rev | TCGACCCAAAGTTGAAGTCC<br>TGCATCTTTTGTGCTTGAC       | chaperonin involved in folding new polipeptide chains      | 4          |
| <b>Heat shock protein 60</b><br>(hsp60)*          | Cr_HSP60_For<br>Cr_HSP60_Rev | TATCGCCAAGGAAGGTTTTG<br>TCTTCCGGGGTTGTTACTTG      | chaperonin involved in folding new polipeptide chains      | 4          |
| <b>Manganese superoxide dismutase</b><br>(MnSOD)* | Cr_MnSOD_For<br>Cr_MnSOD_Rev | ATGGGGATGGCTTGGTTATT<br>ATACCGAACAAAGGCACCAG      | antioxidant activity, scavenger of free radicals           | 5          |
| <b>Mismatch repair protein</b><br>(mtMutS)*       | Cr_MtMus_For<br>Cr_MtMus_Rev | ATAAGCCGGATGTTCTAGTGTA<br>CCATTTGAAGCAAGGATCTTTTA | DNA repair                                                 | 6          |
| <b>Elongation factor-1</b><br>(EF1)*              | Cr_EF1_For<br>Cr_EF1_Rev     | CTCCATCTGCCATTTCCACT<br>GCTGCTTTTGGTGGATCATT      | delivery of aminoacylated tRNA to the elongating ribosomes | 7          |



|                     |            |                       |                                                  |   |
|---------------------|------------|-----------------------|--------------------------------------------------|---|
| <b>Cytochrome b</b> | Cr_Cytb_F2 | TGGGAGCTAGTATCTTGGTGC | Component of the<br>electron transport<br>system | 8 |
| ( <i>cytb</i> )     | Cr_Cytb_R2 | GGTTCCTCTACCGGGTTAGC  |                                                  |   |

---

240

241

242

243

244

245

246

247

248

249

250

251

252

253

254

255

256

257

258

259

260

261

262

263 **Supplementary References**

- 264 1. Takai, K., Horikoshi, K. Rapid detection and quantification of members of the archaeal community  
265 by quantitative PCR using fluorogenic probes. *App. Env. Microbiol.* **66**, 5066-5072 (2000).
- 266 2. Nadkarni, M. A., Martin, F. E., Jacques, N. A., Hunter, N. Determination of bacterial load by real-  
267 time PCR using a broad-range (universal) probe and primers set. *Microbiology*, **148**(1), 257-266  
268 (2002).
- 269 3. Haguenaer, A., Zuberer, F., Ledoux, J. B., Aurelle, D. Adaptive abilities of the Mediterranean red  
270 coral *Corallium rubrum* in a heterogeneous and changing environment: from population to functional  
271 genetics. *J. Exp. Mar. Biol. Ecol.* **449**, 349-357 (2013).
- 272 4. Hartl, F. U., Bracher, A., Hayer-Hartl, M. Molecular chaperones in protein folding and proteostasis.  
273 *Nature*, **475**(7356), 324 (2011).
- 274 5. Sinha, K., Das, J., Pal, P. B., Sil, P. C. Oxidative stress: the mitochondria-dependent and  
275 mitochondria-independent pathways of apoptosis. *Arch. Toxicol.* **87**(7), 1157-1180 (2013).
- 276 6. Bilewitch, J. P., Degnan, S. M. A unique horizontal gene transfer event has provided the octocoral  
277 mitochondrial genome with an active mismatch repair gene that has potential for an unusual self-  
278 contained function. *BMC Evol. Biol.* **11**(1), 228 (2011).
- 279 7. Sasikumar, A. N., Perez, W. B., Kinzy, T. G. The many roles of the eukaryotic elongation factor 1  
280 complex. *Wiley Interdisciplinary Reviews: RNA*, **3**(4), 543-555 (2012).
- 281 8. Finkel, T., Holbrook, N. J. Oxidants, oxidative stress and the biology of ageing. *Nature*, **408**(6809),  
282 239 (2000).
